# Supplementary material for: Antagonism between germ cell-less and Torso receptor regulates transcriptional quiescence underlying germline/soma distinction
Source: eLife. 2021 Jan 18;10:e54346. doi: 10.7554/eLife.54346 (PMC7843132; doi:10.7554/eLife.54346)
Supplement: Figure 3—source data 1. [file elife-54346-fig3-data1.xlsx]

## Sheet: Sheet2
Pole cell count
GCL	Mat-GAL4/UAS-Sxl	Wild Type
0	1	18
1	4	19
2	6	20
3	7	21
4	8	22
5	11	25
6	12	26
7	13	27
8	16	25
13	22	26
0	23	25
2	12
3	16
4
5
6
7
0
3
5
7
7
