# Supplementary material for: Antagonism between germ cell-less and Torso receptor regulates transcriptional quiescence underlying germline/soma distinction
Source: eLife. 2021 Jan 18;10:e54346. doi: 10.7554/eLife.54346 (PMC7843132; doi:10.7554/eLife.54346)
Supplement: Figure 5—source data 1. [file elife-54346-fig5-data1.xlsx]

## Sheet: Sheet1
Pole cell count
gcl	Sxl +	Sxl-			Note: Sxl + includes embryos of the following genotypes: gcl; Sxl/Bin X gcl; Sxl/Y
2	5	8
2	6	10
5	0	10
3	7	8
2	6	10
0	2	10
0	2	3
3	5	4
4	6	16
0	0	8
3	4	5
2	2	3
6	2	9
3	3	5
3		3
1		4
0		11
1		8
3		11
2		0
1		3
2		2
1		3
2		10
0		12
3		10
0		8
		0
		0
		4
