# Supplementary material for: Antagonism between germ cell-less and Torso receptor regulates transcriptional quiescence underlying germline/soma distinction
Source: eLife. 2021 Jan 18;10:e54346. doi: 10.7554/eLife.54346 (PMC7843132; doi:10.7554/eLife.54346)
Supplement: Figure 6—source data 1. [file elife-54346-fig6-data1.xlsx]

## Sheet: Sheet1
Pole Cell Counts
yw	gcl	gcl-;sxl RNAi
24	10.5	0
31.5	11	0
35.5	7	0
28.5	10.5	0
37	6.5	28
25	0	0
28.5	0	0
38.5	8.5	0
33	7	0
25	1	35
42	9	0
27	0	0
38	0	0
35.5	0	17.5
34.5	2	0
24	6.5	25.5
32	0	23.5
22		0
26.5		0
32		29
		0
		0
		23
