# Supplementary material for: Antagonism between germ cell-less and Torso receptor regulates transcriptional quiescence underlying germline/soma distinction
Source: eLife. 2021 Jan 18;10:e54346. doi: 10.7554/eLife.54346 (PMC7843132; doi:10.7554/eLife.54346)
Supplement: Figure 8—source data 1. [file elife-54346-fig8-data1.xlsx]

## Sheet: PoleCells_tslRescueNC1314
Pole cell counts
WT	gcl	gcl;tsl
25	4	21
20	6	25
18	2	22
19	6	21
17	0	21
22	0	18
21	3	18
25	4	22
21	1	20
20	2	21
14	4	16
25	6	20
21	0	9
22	4	8
23	2	20
15	6	19
24	2	19
	0	21
	0
	3
	11
	0
	1
	8
	0
