# Supplementary material for: Antagonism between germ cell-less and Torso receptor regulates transcriptional quiescence underlying germline/soma distinction
Source: eLife. 2021 Jan 18;10:e54346. doi: 10.7554/eLife.54346 (PMC7843132; doi:10.7554/eLife.54346)
Supplement: Supplementary file 1. [file elife-54346-supp1.xlsx]

## Sheet: tll probes
tll transcript FISH probes
PROBE #	PROBE (5'-> 3')
1	ttgtgttgtctgctgtgagg
2	gactcgctgagatcacgatg
3	gatatatccttggttactcc
4	ggtattgcggattgtgtgat
5	tgttttaacggtttgggtgg
6	tctttgagtcgttttggatt
7	aatttcacttggcactggtg
8	tttgtagaaacgcttgcaca
9	cgatgtggggcgtaattttg
10	atccatcatgtctggtgaac
11	gaaagacgcacgctgttgta
12	ggcacatggtatagaatgcg
13	tgtgatctctgcagactttg
14	cgtagatgccgtaatgcttg
15	atgctcctcttgaagaatcc
16	tgcgacttgcacacatactg
17	tgttcattccgacctcaaag
18	atcatggcatccttgtacat
19	gtgttcatcagaatttcggc
20	catcggtactccaggaaagc
21	atgtgagcaggatgatgacc
22	cggataagtccaagacagcg
23	cgagaagaaaccgtggtgtc
24	ttcttgaataggtgttccgc
25	tacgctcttgatccagttga
26	catggccaggatgaagaact
27	attcatgggcattaggtact
28	ttctcggactcgtagacgaa
29	gtcaatgttcagatggcaca
30	gaaatagccctcagacactc
31	acggtggtgacttacggaag
32	aaatcctcggtagaacttgc
33	ctgtcaggattgagctgttg
34	ctctggatgtagttgtgcag
35	aagagcgtctggaatcgcat
36	gtgaagcttgagaccttgtg
37	tttcggaagaacagctcctc
38	caatggtgatgtcgccgatg
39	tacatgtcggagatgaggcg
40	ttttcagatcttgcgctgac
41	cgattagtctaggctctaca
42	cacttggaaggcacttcgag
43	tcttccgagattatcacagt
44	tcactgatcgagtattgtcc
45	tcgactcctggatatgagaa
46	aaggtgagtgttgtgtacgt
47	acttcgagttctgtttaggt
48	ggtctgagagactttagcta
